# Supplementary material for: Double-Tube End Ileostomy: An Alternative to Classical Defunctioning Stoma in Rectal Surgery
Source: Research Square preprint supplement (doi:10.21203/rs.3.rs-5982369/v1), 2025-05-06
Supplement: Supplementary file 1 [file 09a18500ecc2feba2298c923.docx]

**Definitions and Criterias**

**(1) Criteria for Intestinal Function Recovery:**
① Return of bowel sounds (confirmed by auscultation);
② Output of intestinal fluid or gas from the stoma/catheter.

**(2) Diagnostic Criteria for Anastomotic Leak:**① Fever, abdominal pain, or abnormal drainage from the abdominal cavity drain (e.g., gas, purulent fluid, or feces);
② Elevated white blood cell count, neutrophils, C-reactive protein, and other infection indicators;
③ Imaging tests show the presence of free gas or contrast medium leaking from the anastomosis into the outer side of the intestinal wall.

**(3) DTEI Group Contrast Examination Qualification Criteria:**① Patency of the anastomosis, no stenosis, contrast medium leakage, or gas leak;
② Intact intestinal wall structure, without defects.

**(4) Criteria for Removal of Abdominal Drain:**① Continuous drainage of <50 ml for 24 hours with clear appearance;
② No signs of infection or abnormal imaging results;
③ Stepwise removal of the drain (complete removal 24 hours after the reduction of the drain), with monitoring for 24 hours after removal.

**(5) Discharge Criteria:**① Recovery of gastrointestinal function (tolerance of semi-liquid food, no abdominal bloating/pain);
② Imaging confirms healing of the anastomosis (no leakage);
③ No complications such as incision, respiratory, or pelvic infections, and no anastomotic leak.

**(6)The contraindications for tube removal in the DTEI group:**

① Symptoms and signs: Clinical manifestations such as abdominal pain, abdominal distension, rectal irritation signs, localized peritonitis, high fever, etc.

② Abnormal fluid drainage from the abdominal drainage tube: The presence of gas, fecal fluid, or pus draining from the tube, indicating possible anastomotic infection or other complications.

③ Abnormal laboratory findings: Elevated white blood cell count, C-reactive protein, and procalcitonin.

④ Radiographic evidence: When contrast agent is injected through the distal catheter, if extravasation of contrast agent is observed at the anastomosis site, this suggests that the anastomosis may not be fully healed, and there is a risk of leakage; or other imaging findings (such as CT or BUS) indicating abdominal infection or anastomotic leakage.

**(7) The definition of "time to recovery of intestinal function":**

The period from the end of surgery to the restoration of intestinal motility.

**Enteral Nutrition Implementation Plan for the CI Group**

**(1) Early Postoperative Phase (24-48 hours):**Strict fasting is enforced to reduce mechanical irritation of the gastrointestinal tract, ensuring intestinal rest and creating favorable conditions for anastomotic healing while promoting the gradual recovery of intestinal function. The duration of fasting should be appropriately adjusted based on the patient's postoperative recovery and clinical needs.

**(2) Initial Phase (48-72 hours post-surgery):**Once intestinal peristalsis resumes, trial drinking is initiated, starting with warm water, with each intake not exceeding 50 mL and repeated every 2 hours. This approach, involving small and frequent intakes, is used to observe the patient's tolerance to enteral nutrition. The total daily fluid intake during this phase is controlled at 200-400 mL to prevent excessive gastrointestinal burden. The main goal of this trial drinking phase is to assess the initial recovery of intestinal function, particularly the gastrointestinal gas and fluid evacuation functions.

**(3) Second Phase (3-5 days post-surgery):**From the 3rd to the 5th postoperative day, the transition to a low-residue enteral nutrition formula begins. The enteral nutrition at this stage should provide sufficient energy and protein to support the patient's recovery. It is recommended to provide 15-20 kcal/kg of energy and 0.8-1.0 g/kg of protein daily to meet the patient's basal metabolic needs and promote wound healing. In addition, the low-residue formula helps minimize gastrointestinal irritation and prevents adverse reactions such as bloating or diarrhea caused by excessive fiber intake.

**(4) Third Phase (5-7 days post-surgery):**From the 5th to the 7th postoperative day, the transition to a low-residue homogeneous liquid diet is gradually implemented. The foods in this phase should be highly digestible and low-residue to ensure that the intestinal tract receives the necessary nutrients without additional burden. Homogeneous liquid diets play an important role in further restoring intestinal function, particularly in the normalization of intestinal motility and digestive enzyme secretion. The key at this stage is to ensure the fluidity of food, reducing the burden on intestinal peristalsis.

**(5) Fourth Phase (7-14 days post-surgery):**From the 7th to the 14th postoperative day, a gradual transition to a semi-liquid diet is made, increasing the solid content of food based on the individual patient's tolerance. The goal of this phase is to help the patient adapt to regular food textures by progressively increasing the solidity of the diet. The semi-liquid diet should be rich in proteins, vitamins, and minerals to support postoperative recovery and promote the reconstruction of intestinal function. At this time, it is essential to closely monitor the patient’s digestion to ensure there are no gastrointestinal discomforts or abnormal bowel movements.

**(6) Final Transition Phase (2-4 weeks post-surgery):**From 2 to 4 weeks post-surgery, when the patient’s intestinal function is fully recovered and can tolerate more complex foods, the transition to a regular diet is initiated. During this phase, the diet should be personalized based on the patient’s appetite, intestinal reactions, and overall health status. The regular diet should gradually return to standard nutritional intake, with attention to controlling the types and amounts of food, avoiding excessive intake of stimulating foods, high-fat, and high-fiber foods, to ensure optimal recovery of intestinal function.
